# Supplementary material for: Cholestane-3β,5α,6β-triol Induces Multiple Cell Death in A549 Cells via ER Stress and Autophagy Activation
Source: MDPI journal article supplement (doi:10.3390/md22040174), 2024-04-13
Supplement: s1 [file s1]

## Supplementary Material

# Cholestane-3 $\beta$ ,5 $\alpha$ ,6 $\beta$ -triol induces multiple cell death in A549 cells via ER stress and autophagy activation

Jiaxi Chen <sup>1,†</sup>, Jieping Zhang <sup>1,†</sup>, Lijuan Cai <sup>1</sup>, Li Guo <sup>1</sup>, Zhenyu Cai <sup>1</sup>, Hua Han <sup>1,\*</sup> and Wen Zhang <sup>1,2,\*</sup>

<sup>1</sup> School of Medicine, Tongji University, 1239 Si-Ping Road, Shanghai 200092, China

<sup>2</sup> Ningbo Institute of Marine Medicine, Peking University, 56 Kang-Da Road, Ningbo 315832, China

\* Correspondence: hanhua@tongji.edu.cn (H.H.); wenzhang1968@163.com (W.Z.)

† These authors contributed equally to this work.

## Table of contents

|                                                                                                       |   |
|-------------------------------------------------------------------------------------------------------|---|
| Figure S1. CT induced the cell death of different cell lines. ....                                    | 2 |
| Figure S2. CT induced the cell death of A549 cells at concentration- and time-dependent manner. ....  | 3 |
| Figure S3. STS induced the cell death of A549 cells. ....                                             | 3 |
| Figure S4. Western blot of cleaved-PARP and cleaved-caspase-3 in A549 cells.                          | 4 |
| Figure S5. RNA-seq analysis of 10 $\mu$ M CT-treated A549 cells. ....                                 | 4 |
| Figure S6. Western blot of p-IRE1 $\alpha$ and LC3 II levels in A549 cell lines treated with CT. .... | 5 |

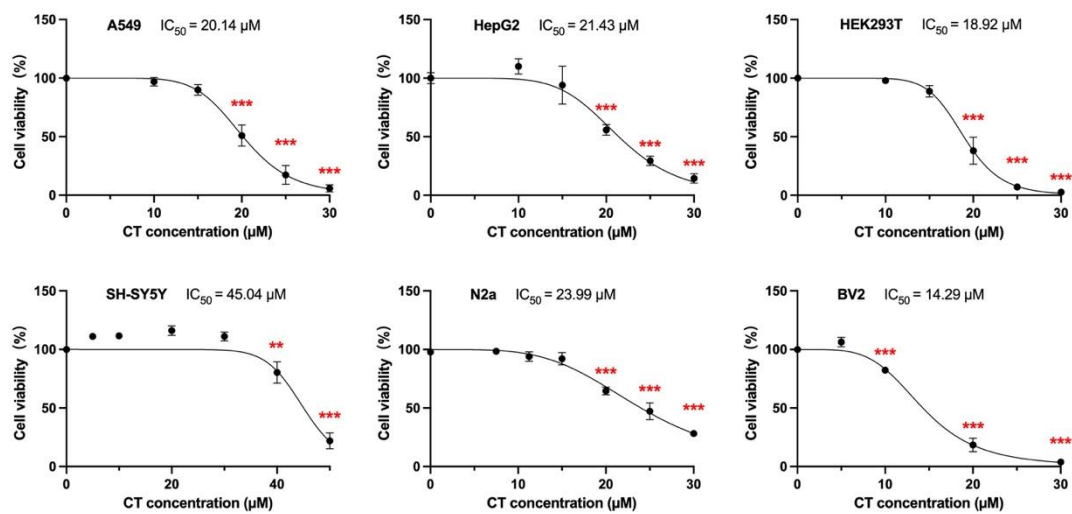

**Figure S1. CT induced the cell death of different cell lines.** CT inhibited the cell viability of A549, HepG2, HEK293T, SH-SY5Y, N2a, BV2 cells. Cell viability was assessed by CCK-8 kit after the treatment of CT at different concentrations for 24 h. Statistical significance was determined using one-way ANOVA with Dunnett's post-test, \*\* $p < 0.005$ , \*\*\* $p < 0.001$  compared with the NC group.

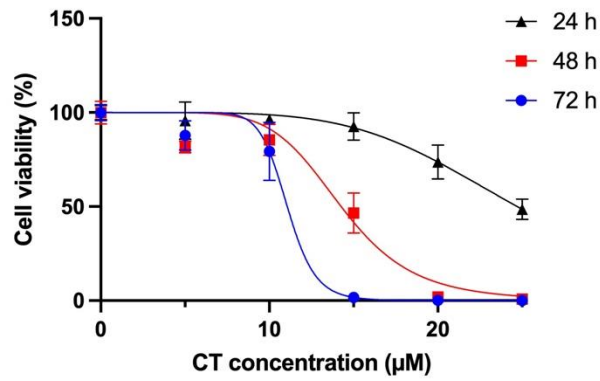

**Figure S2. CT induced the cell death of A549 cells at concentration- and time-dependent manner.** Cell viability was assessed by CCK-8 kit after the treatment of CT at different concentrations for 24, 48, 72 h.

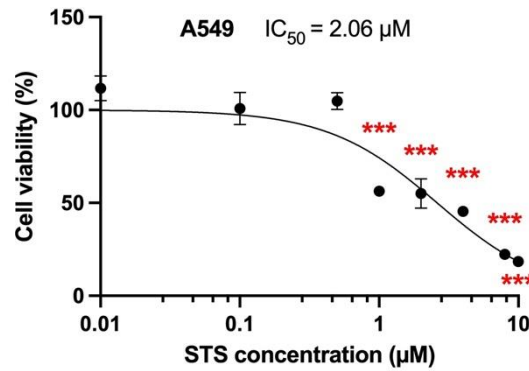

**Figure S3. STS induced the cell death of A549 cells.** Cell viability was assessed by CCK-8 kit after the treatment of STS at different concentrations for 24 h. Statistical significance was determined using one-way ANOVA with Dunnett's post-test,  $n = 2$ , \*\*\* $p < 0.001$  compared with the NC group.

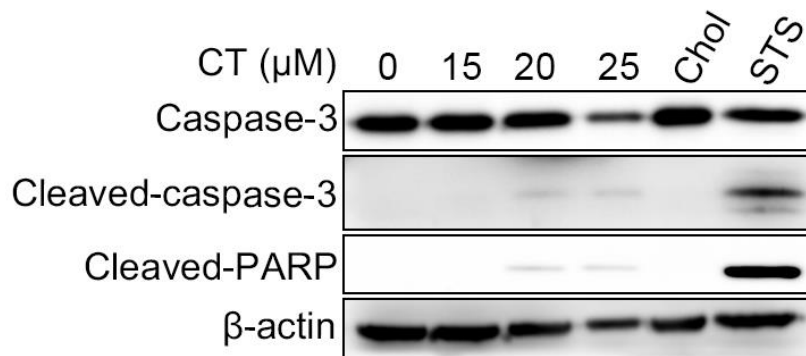

**Figure S4. Western blot of cleaved-PARP and cleaved-caspase-3 in A549 cells.**

Cells were treated with series doses of CT for 24 h. Cells were treated with 1  $\mu$ M STS for 24 h as the positive control, and 20  $\mu$ M cholesterol (Chol) for 24 h as an isotype control.

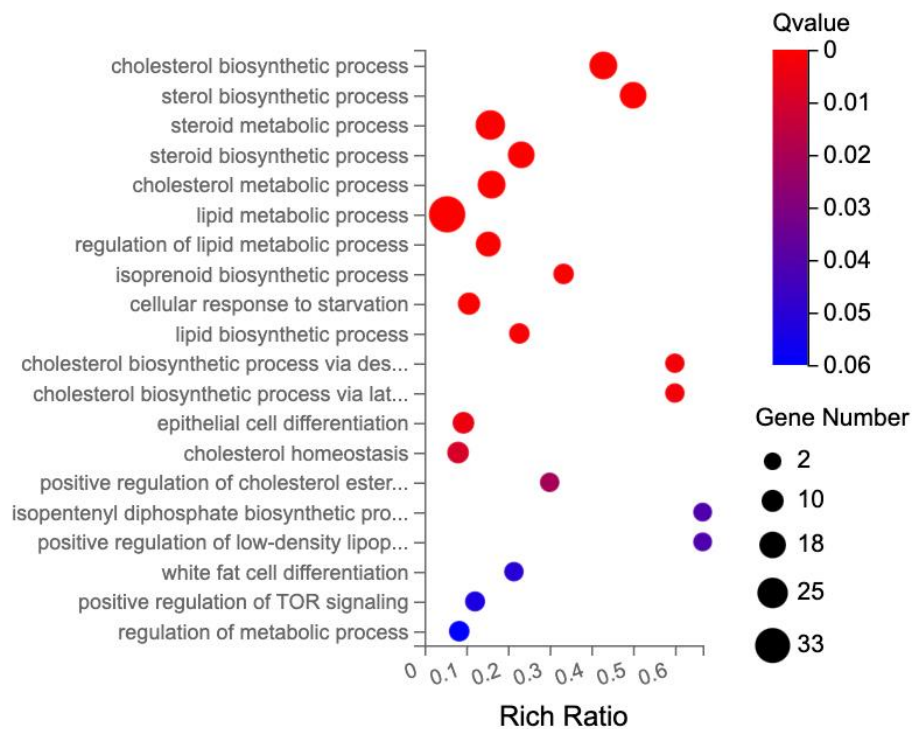

**Figure S5. RNA-seq analysis of 10  $\mu$ M CT-treated A549 cells. GO analysis of**

the upregulated gene clusters in CT 10  $\mu$ M treatment groups. The function of Q value  $\leq 0.05$  was considered as significant enrichment.

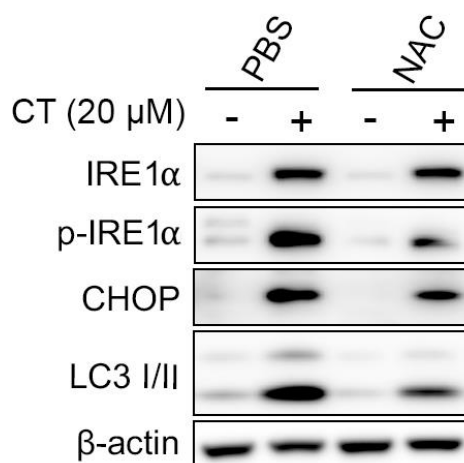

**Figure S6. Western blot of p-IRE1 $\alpha$  and LC3 II levels in A549 cell lines treated with CT.** The cells were pre-treated with 1 mM 4-PBA or 3 mM NAC for 1 h, then incubated with CT at 20  $\mu$ M for 24 h.
